CORRECTION

# Correction: Antipsychotic medications and stroke in schizophrenia: A case-crossover study

Wen-Yin Chen, Lian-Yu Chen, Hsing-Cheng Liu, Chi-Shin Wu, Shu-Yu Yang, Chun-Hung Pan, Shang-Ying Tsai, Chiao-Chicy Chen, Chian-Jue Kuo

There are errors in the author affiliations. The correct affiliations are as follows:

Wen-Yin Chen<sup>1,2</sup>, Lian-Yu Chen<sup>1,3</sup>, Hsing-Cheng Liu<sup>1,4,5</sup>, Chi-Shin Wu<sup>6</sup>, Shu-Yu Yang<sup>1,7</sup>, Chun-Hung Pan<sup>1,8</sup>, Shang-Ying Tsai<sup>4,5</sup>, Chiao-Chicy Chen<sup>4,5,9</sup>, Chian-Jue Kuo<sup>1,4,5</sup>

**1** Taipei City Psychiatric Centre, Taipei City Hospital, Taipei, Taiwan, **2** Graduate Institute of Epidemiology and Preventive Medicine, National Taiwan University College of Public Health, Taipei, Taiwan, **3** Department of Psychiatry, National Cheng Kung University, Tainan, Taiwan, **4** Department of Psychiatry, School of Medicine, College of Medicine, Taipei Medical University, **5** Psychiatric Research Center, Taipei Medical University Hospital, Taipei, Taiwan, **6** Department of Psychiatry, National Taiwan University Hospital, Taipei, Taiwan, **7** Graduate Institute of Clinical Pharmacy, College of Pharmacy, Kaohsiung Medical University, Kaohsiung, Taiwan, **8** Department of Psychology, National Chengchi University, Taipei, Taiwan, **9** Department of Psychiatry, Mackay Memorial Hospital, Taipei, Taiwan and Department of Psychiatry, Mackay Medical College, Taipei, Taiwan.

## Reference

1. Chen W-Y, Chen L-Y, Liu H-C, Wu C-S, Yang S-Y, Pan C-H, et al. (2017) Antipsychotic medications and stroke in schizophrenia: A case-crossover study. PLoS ONE 12(6): e0179424. <https://doi.org/10.1371/journal.pone.0179424> PMID: 28614417

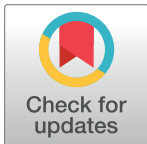

## OPEN ACCESS

**Citation:** Chen W-Y, Chen L-Y, Liu H-C, Wu C-S, Yang S-Y, Pan C-H, et al. (2019) Correction: Antipsychotic medications and stroke in schizophrenia: A case-crossover study. PLoS ONE 14(5): e0217323. <https://doi.org/10.1371/journal.pone.0217323>

**Published:** May 21, 2019

**Copyright:** © 2019 Chen et al. This is an open access article distributed under the terms of the [Creative Commons Attribution License](https://creativecommons.org/licenses/by/4.0/), which permits unrestricted use, distribution, and reproduction in any medium, provided the original author and source are credited.
